# Supplementary material for: Identification of Genetic Polymorphisms of PI, PIII, and Exon 53 in the Acetyl-CoA Carboxylase-α (ACACα) Gene and Their Association with Milk Composition Traits of Najdi Sheep
Source: MDPI journal article supplement (doi:10.3390/ani13081317), 2023-04-12
Supplement: s1 [file s1]

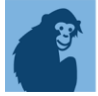

*Supplementary Material*

**Identification of genetic polymorphisms of PI, PIII, and exon53 in the acetyl-CoA carboxylase- $\alpha$  (ACAC $\alpha$ ) gene and their association with milk composition traits of Najdi sheep**

**Abdulkareem M. Matar\*, Abdulrahman S. Alharthi, Moez. Ayadi, Maged A. Al-Garadi, Riyadh S. Aljummah**

**\* Correspondence:** Abdulkareem M. Matar: [Abdmatar@ksu.edu.sa](mailto:Abdmatar@ksu.edu.sa)

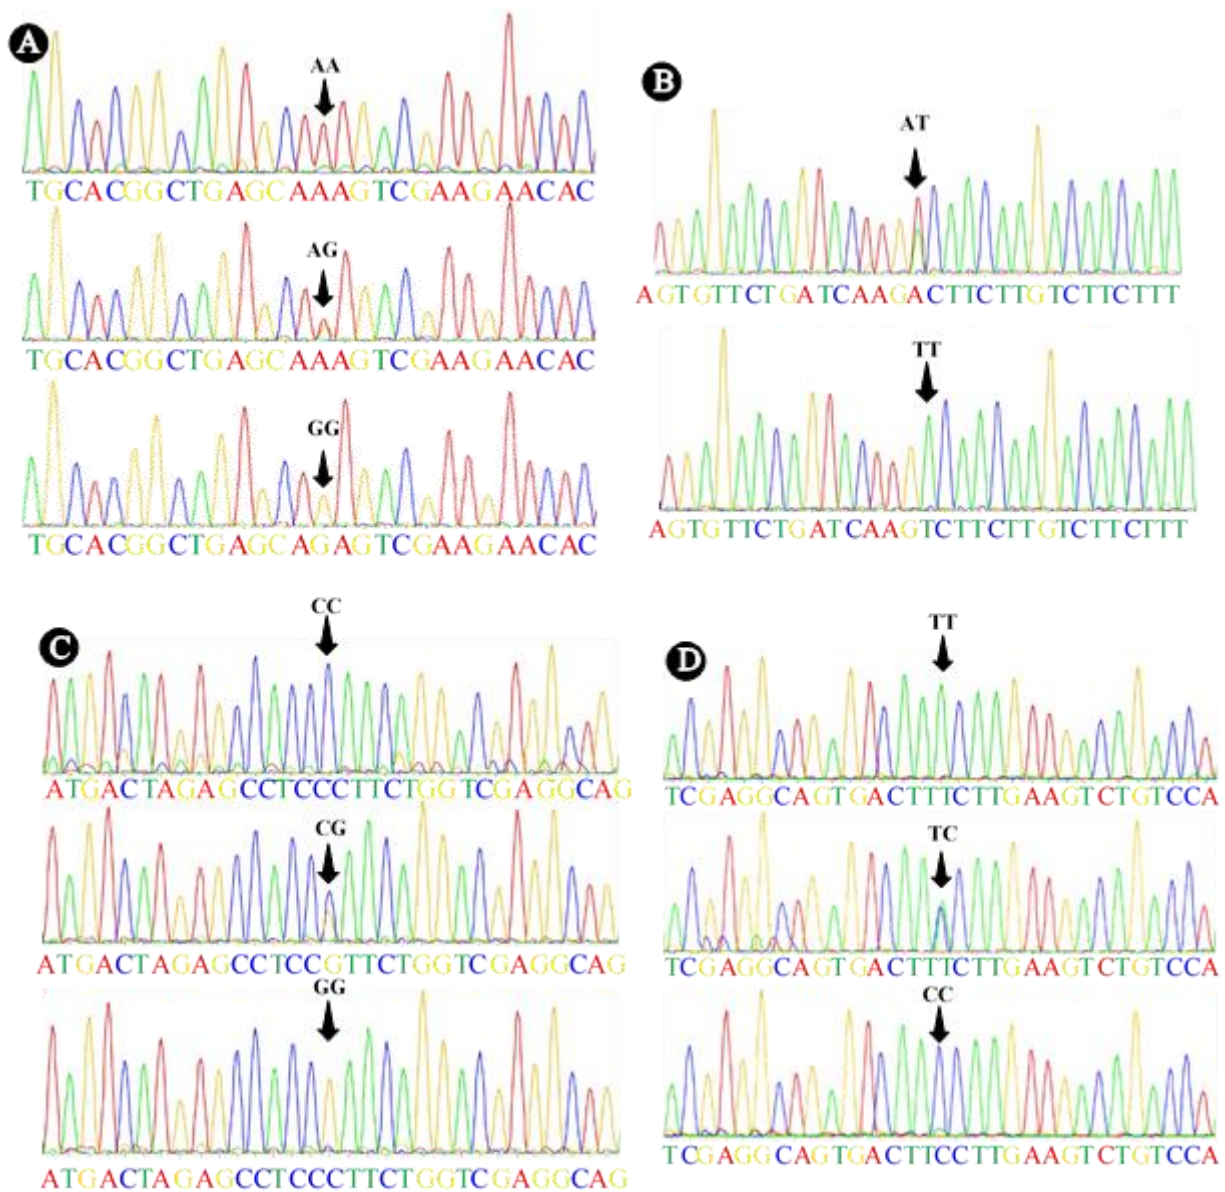

**Figure S1.** The SNPs identifying the promoter I region in the Najdi sheep *ACACα* gene as follows: A: 4412G>A; B:4441T>A, C: 4485C>G; D: 44507T>C.

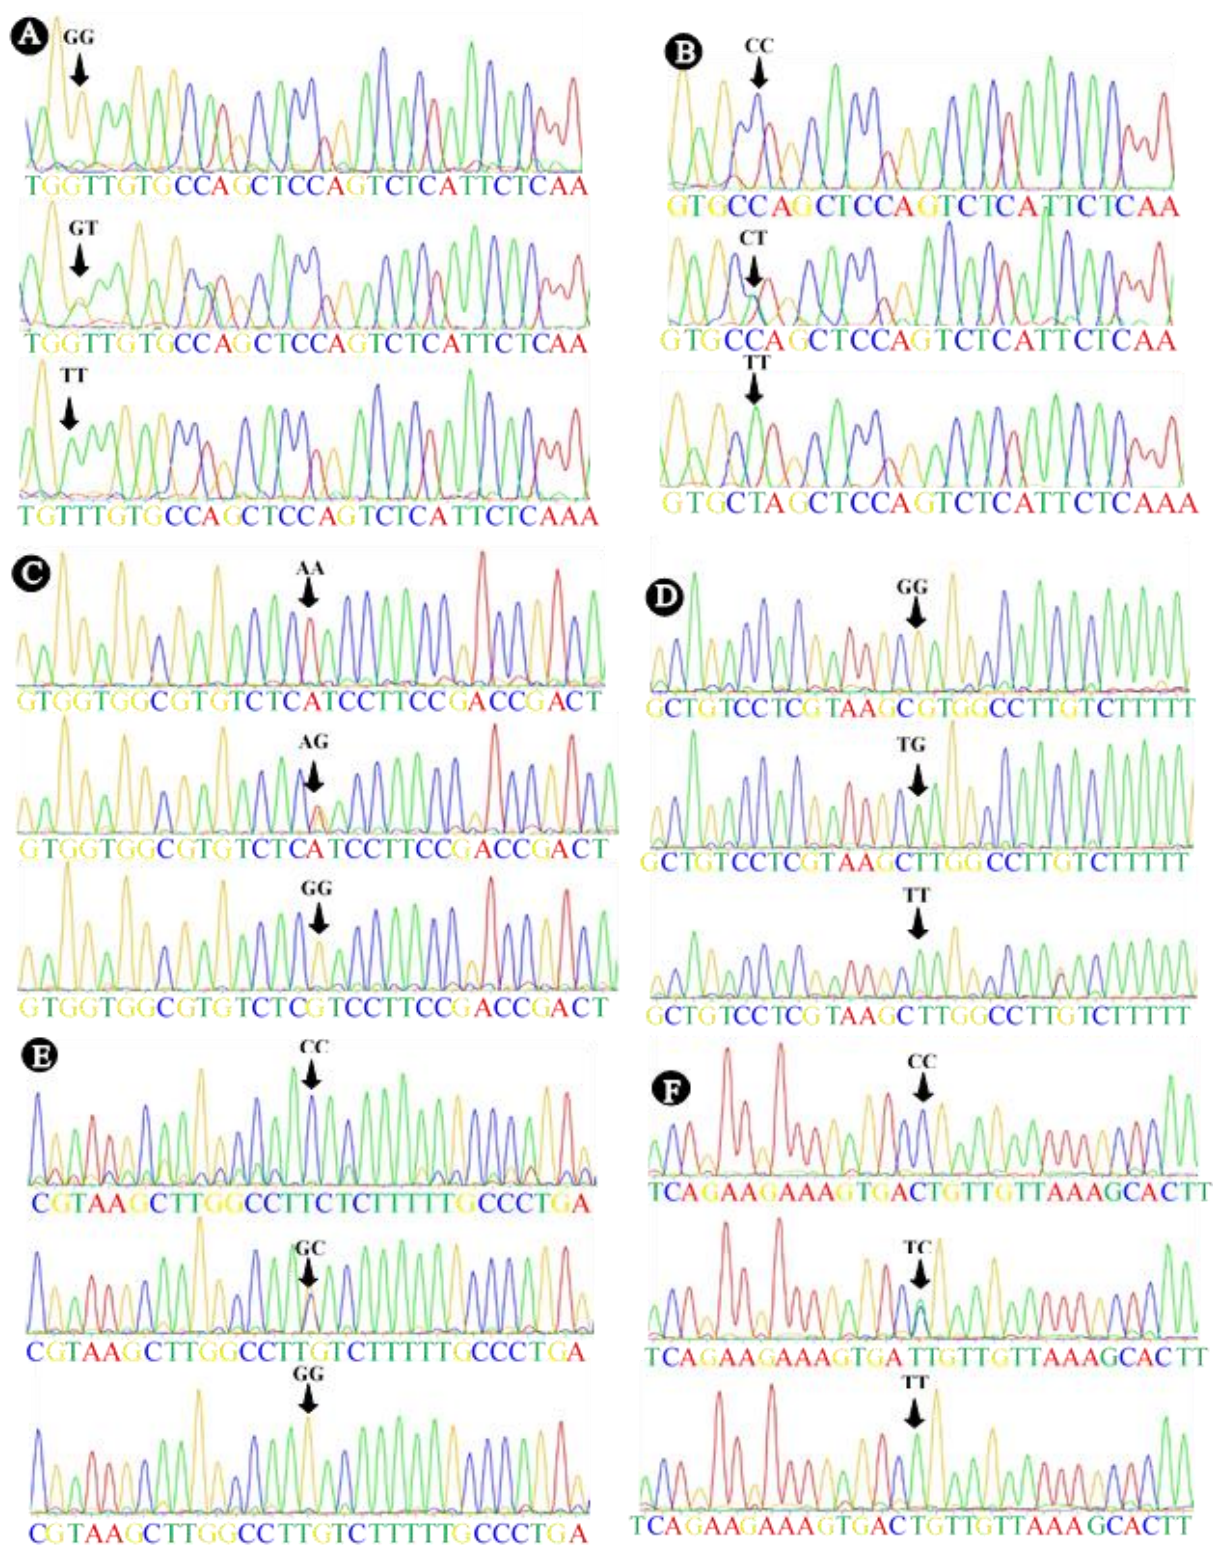

**Figure S2.** The SNPs identification of promoter III region in the Najdi sheep ACAC $\alpha$  gene as follows: A:1007T>G; B:1014C>T, C:1168A>G; D:1331G>T; E:1339C>G; F:1431C>T.



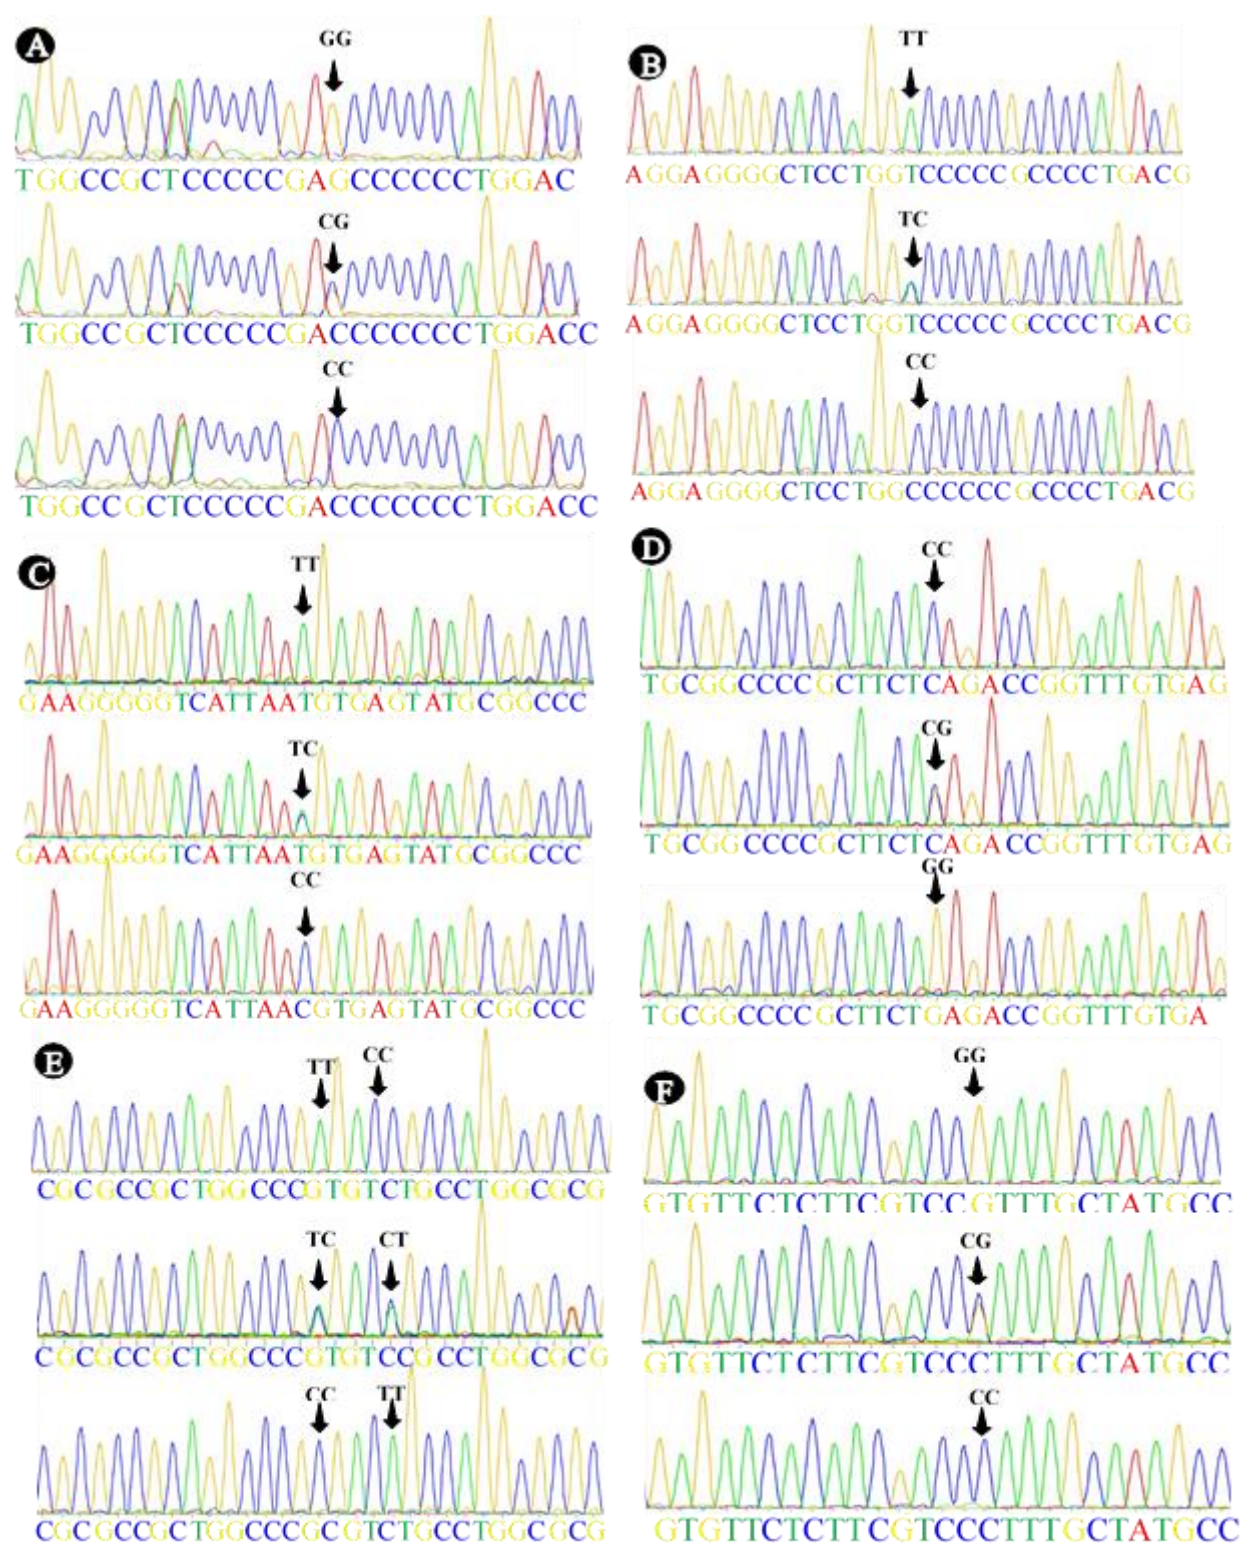

**Figure S3.** The SNPs identification of the exon 53 region in Najdi sheep ACAC $\alpha$  gene as follows: A:6627G>C; B:6668C>T; C:6855T>C; D:6860G>C; E:(6894T>C and 6898C>T); F:6977C>G.

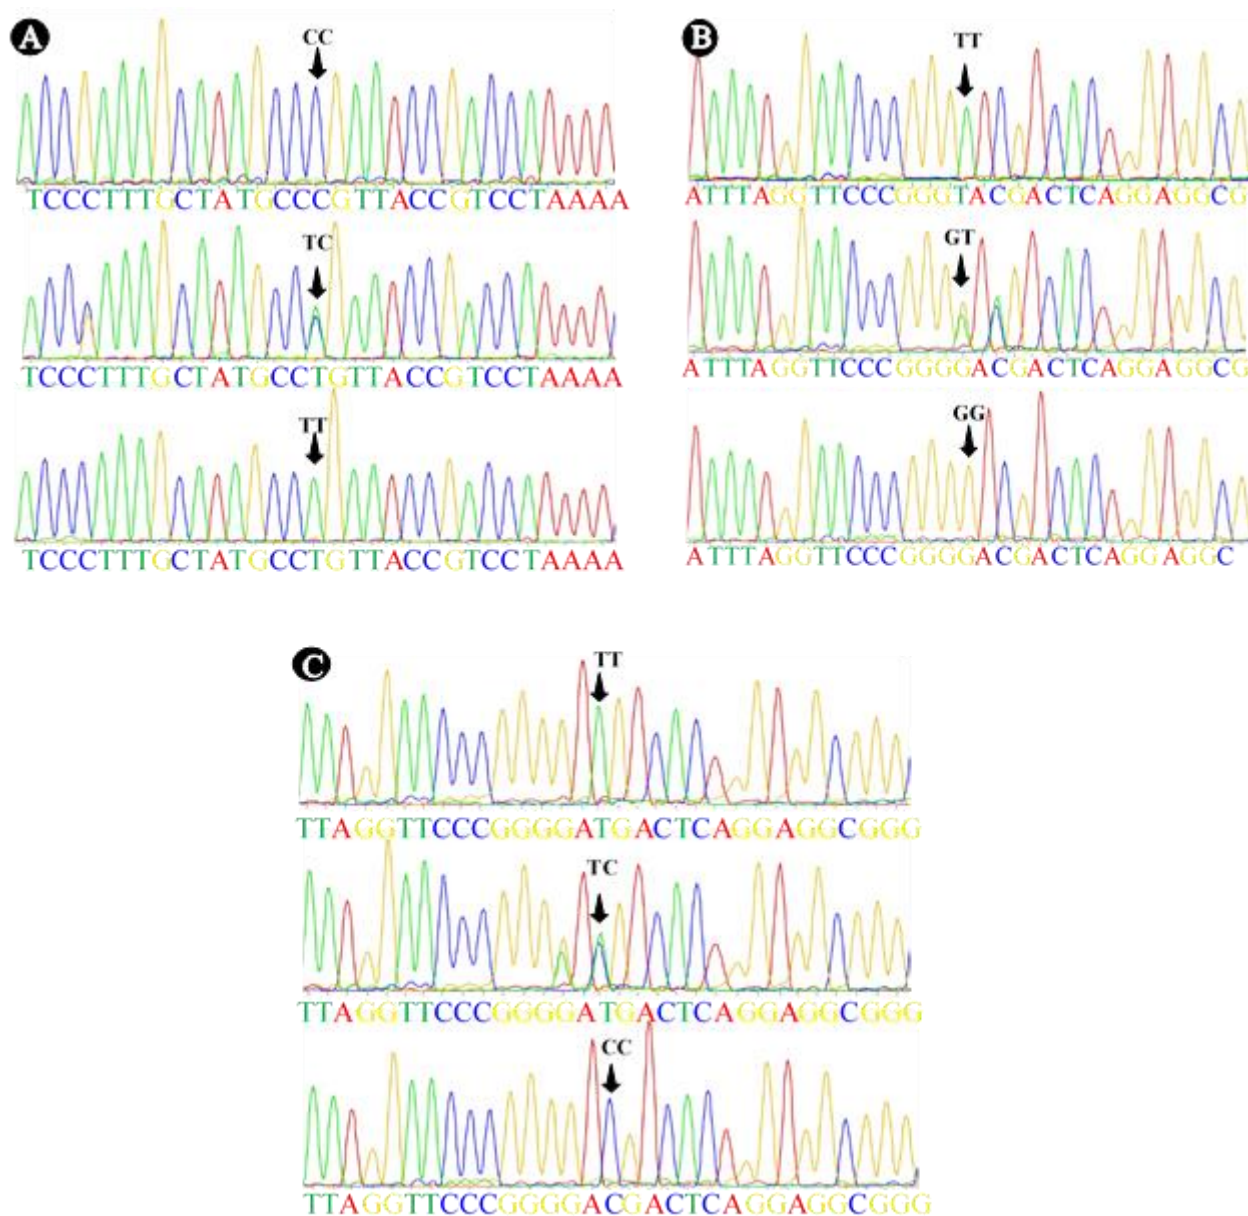

**Figure S4.** The SNPs identification of the exon 53 region in the Najdi sheep ACAC $\alpha$  gene as follows: A:6989T>C; B:7029G>T, C:7031C>T.
